# Supplementary material for: Influence of Bacillus subtilis and Trichoderma harzianum on Penthiopyrad Degradation under Laboratory and Field Studies
Source: PubMed Central journal article supplement (PMC7145286; doi:10.3390/molecules25061421), 2020-03-20
Supplement: molecules-25-01421-s001.pdf [file molecules-25-01421-s001.pdf]

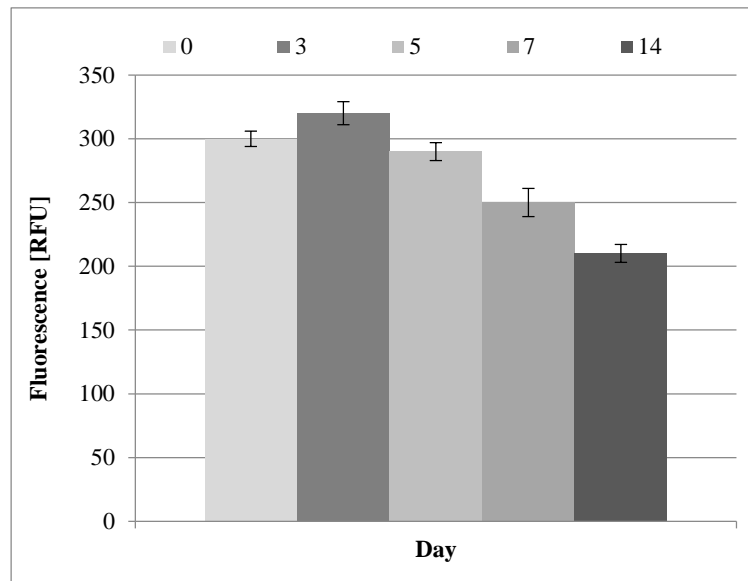

1

2

**Figure S1.** Bacterial cell viability during 14 days of the experiment

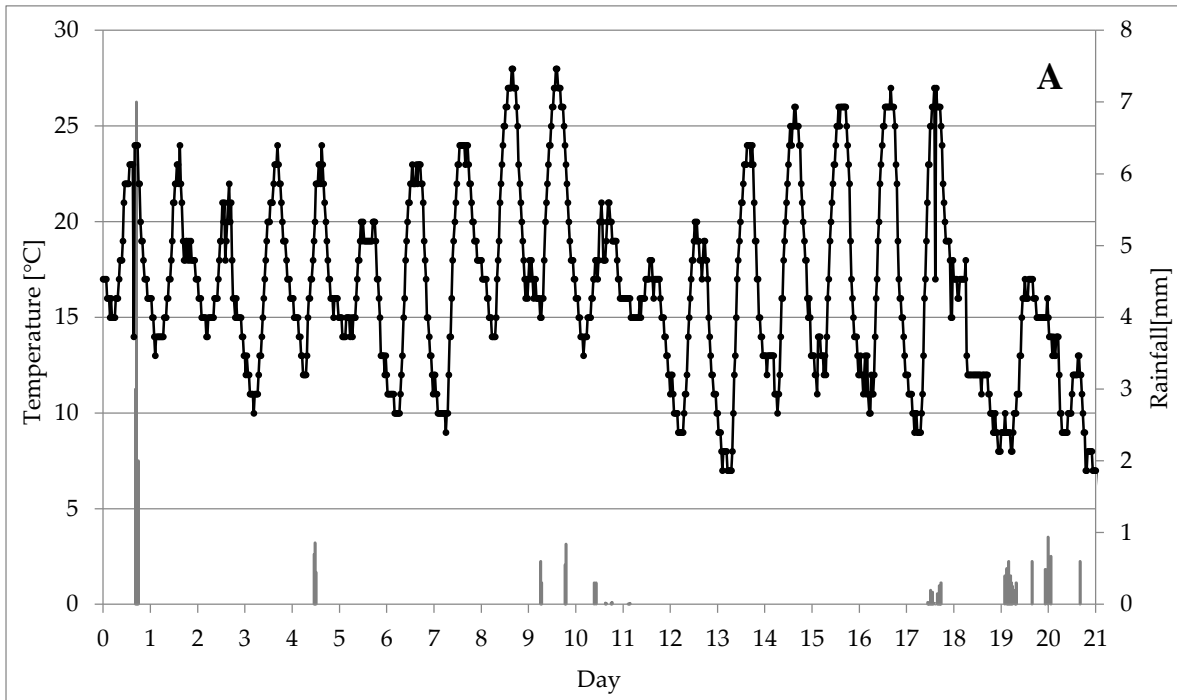

3

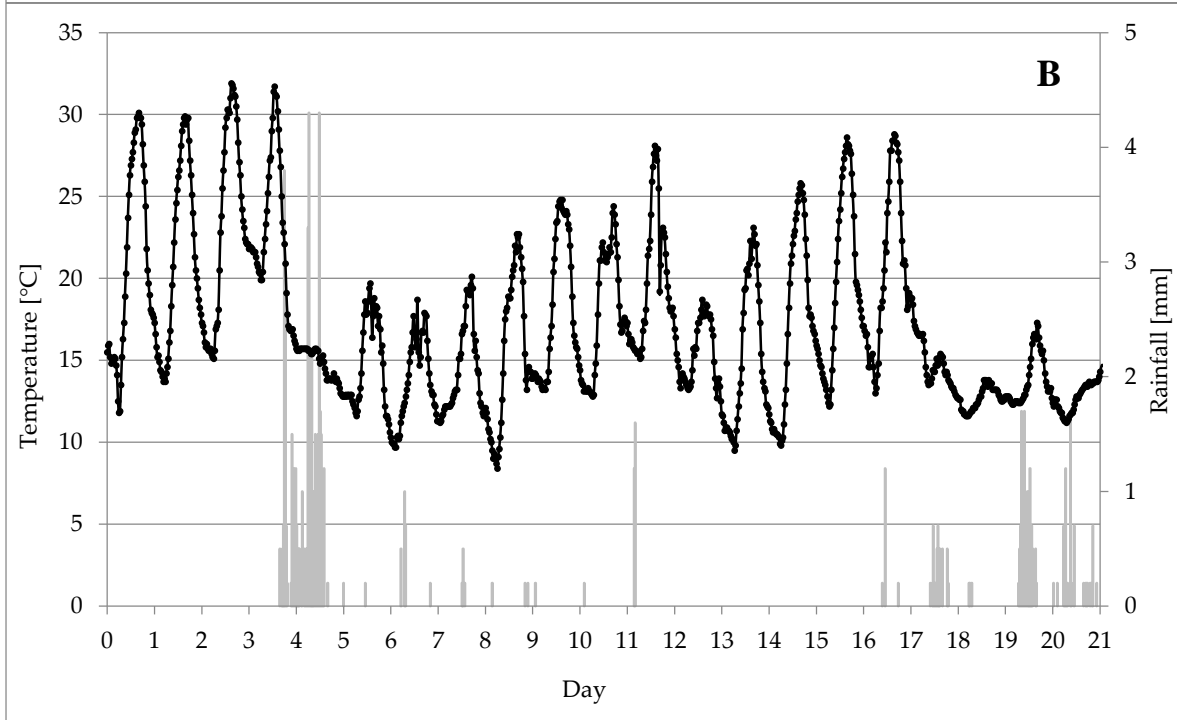

4

5 **Figure S2.** Temperature and precipitation in a period from 8/16/2017 to 9/6/2017 during the experiment  
 6 in the Gala variety in Józefów nad Wisłą (A), and from 9/4/2018 to 9/25/2018 during the experiment in  
 7 the Golden Delicious variety in Rzeszów (B)

8

9 **Table S1.** Method validation parameters: correctness, precision, relative standard deviation, limits of  
 10 quantification (LOQ); matrix: culture media (BO and PDB) and apples

| Active substance | Matrix | Fortification level [mg/kg] | Recovery [%] |       |       |       |       | Average recoveries [%] | SD [%] | RSD [%] | LOQ [mg/kg] |
|------------------|--------|-----------------------------|--------------|-------|-------|-------|-------|------------------------|--------|---------|-------------|
|                  |        |                             | I            | II    | III   | IV    | V     |                        |        |         |             |
| Penthiopyrad     | BO     | 1                           | 97.5         | 105.0 | 107.0 | 105.5 | 102.5 | 103.5                  | 3.7    | 3.6     | 1           |
|                  |        | 100                         | 117.5        | 121.0 | 113.8 | 113.3 | 115.5 | 116.2                  | 3.2    | 2.7     | 100         |
|                  | PDB    | 1                           | 89.0         | 88.5  | 109.5 | 98.5  | 102.0 | 97.5                   | 8.9    | 9.2     | 1           |
|                  |        | 100                         | 112.8        | 115.0 | 112.5 | 109.0 | 107.8 | 111.4                  | 3.0    | 2.7     | 100         |
|                  | Apples | 0.01                        | 118.0        | 118.5 | 117.0 | 112.5 | 110.0 | 115.2                  | 3.7    | 3.3     | 0.01        |
|                  |        | 1                           | 115.5        | 113.5 | 109.0 | 105.0 | 112.5 | 111.1                  | 4.1    | 3.7     | 0.01        |

11  
 12 **Table S2.** Validation parameters - linearity, matrix: culture media (BO and PDB) and apples

| Active substance | Matrix | No. of fortification levels | Linearity [mg/kg] | Calibration curve equation $y = ax + b$ |      | Coefficients of determination R |
|------------------|--------|-----------------------------|-------------------|-----------------------------------------|------|---------------------------------|
|                  |        |                             |                   | a                                       | b    |                                 |
| Penthiopyrad     | BO     | 5                           | 0.004-0.4         | 348.9                                   | 20.8 | 0.9902                          |
|                  | PDB    | 5                           | 0.004-0.4         | 443.2                                   | 28.2 | 0.9901                          |
|                  | Apples | 5                           | 0.01-1            | 32915.6                                 | 8.1  | 0.9983                          |

13  
 14 **Table S3.** Acquisition parameters of a liquid chromatograph with an ion trap mass detector (MRM  
 15 mode) used for patulin determination

|                                       |                                                                                                                              |
|---------------------------------------|------------------------------------------------------------------------------------------------------------------------------|
| <b>Flow rate</b>                      | 1 mL/min                                                                                                                     |
| <b>Injection volume</b>               | 5 $\mu$ L                                                                                                                    |
| <b>Mobile phases:</b>                 |                                                                                                                              |
| <b>A</b>                              | methanol/water/acetic acid 10/89/1 (v/v/v)                                                                                   |
| <b>B</b>                              | methanol/water/acetic acid 97/2/1 (v/v/v)                                                                                    |
|                                       | (both phases contained 5 mmol/L ammonium acetate)                                                                            |
| <b>Gradient</b>                       | 0 % B for 2.0 min<br>50 % B from 2.0 to 5.0 min<br>100% B from 5.0 to 6.0 min<br>100 % B to 7.0 min, then<br>0 % B to 12 min |
| <b>Curtain gas</b>                    | 30 psi                                                                                                                       |
| <b>Ionspray voltage / temperature</b> | -4500 V / 550°C                                                                                                              |
| <b>Ion source gas 1</b>               | 60 psi                                                                                                                       |
| <b>Ion source gas 2</b>               | 60 psi                                                                                                                       |

16  
 17 **Table S4.** MRM transitions for patulin and an internal standard, and mass spectrometer operating  
 18 conditions

| Ionization | Precursor ion | Product ions | Declustering potential | Collision energy | Cell exit potential |
|------------|---------------|--------------|------------------------|------------------|---------------------|
|------------|---------------|--------------|------------------------|------------------|---------------------|

|             |                    | [m/z] | [m/z]      | [V] | [V]     | [V]     |
|-------------|--------------------|-------|------------|-----|---------|---------|
| Patulin     | [M-H] <sup>-</sup> | 153.0 | 109.1/81.0 | -85 | -12/-16 | -7/-9   |
| 13C-Patulin | [M-H] <sup>-</sup> | 160.0 | 115.0/86.1 | -95 | -12/-16 | -13/-13 |

19

20 **Table S5.** Acquisition parameters of a liquid chromatograph with a mass detector (MRM mode) used  
21 for trichothecenes and zearalenone determinations

|                                      |                                                                                                  |
|--------------------------------------|--------------------------------------------------------------------------------------------------|
| <b>Flow rate</b>                     | 0.5 mL/min                                                                                       |
| <b>Injection volume</b>              | 7 $\mu$ L                                                                                        |
| <b>Mobile phases:</b>                |                                                                                                  |
| <b>A</b>                             | 1% CH <sub>3</sub> COOH in H <sub>2</sub> O                                                      |
| <b>B</b>                             | methanol                                                                                         |
|                                      | (both phases contained 5 mM CH <sub>3</sub> COONH <sub>4</sub> )                                 |
| <b>Gradient</b>                      | 30 % B for 0.5 min<br>90 % B from 0.5 to 6.0 min<br>90 % B to 10.0 min, then<br>30 % B to 15 min |
| <b>Curtain gas</b>                   | 25 psi                                                                                           |
| <b>Collision gas</b>                 | 6 psi                                                                                            |
| <b>Ionspray voltage /temperature</b> | -4000 V (negative polarity); 5000 V (positive polarity) / 500°C                                  |
| <b>Ion source gas 1</b>              | 50 psi                                                                                           |
| <b>Ion source gas 2</b>              | 50 psi                                                                                           |

22

23 **Table S6.** MRM transitions for trichothecenes, zearalenone, and an internal standard, and mass  
24 spectrometer acquisition parameters

|                    | Ionization                        | Precursor ion<br>[m/z] | Product ions<br>[m/z] | Declustering potential<br>[V] | Collision energy<br>[V] | Cell exit potential<br>[V] |
|--------------------|-----------------------------------|------------------------|-----------------------|-------------------------------|-------------------------|----------------------------|
| 13C-Deoxynivalenol | [M+Ac] <sup>-</sup>               | 370.2                  | 310.0                 | -50                           | -14                     | -7                         |
| 13C-HT-2 Toxin     | [M+NH <sub>4</sub> ] <sup>+</sup> | 464.1                  | 278.1                 | 51                            | 17                      | 18                         |
| 13C-T-2 Toxin      | [M+NH <sub>4</sub> ] <sup>+</sup> | 508.3                  | 322.1                 | 61                            | 19                      | 8                          |
| 13C-Zearalenone    | [M-H] <sup>-</sup>                | 335.1                  | 139.9                 | -100                          | -42                     | -7                         |
| Deoxynivalenol     | [M+Ac] <sup>-</sup>               | 355.1                  | 264.8/58.9            | -35                           | -20/-38                 | -17/-1                     |
| Diacetoxyscirpenol | [M+Ac] <sup>-</sup>               | 384.1                  | 307.0/247.0           | 51                            | 17/19                   | 20/16                      |
| HT-2 Toxin         | [M+NH <sub>4</sub> ] <sup>+</sup> | 442.2                  | 215.0/263.0           | 51                            | 19/17                   | 14/18                      |
| Nivalenol          | [M+Ac] <sup>-</sup>               | 371.1                  | 281.0/59.0            | -40                           | -22/-40                 | -14/-5                     |
| T-2 Toxin          | [M+NH <sub>4</sub> ] <sup>+</sup> | 484.1                  | 215.0/185.0           | 61                            | 25/29                   | 14/12                      |
| Zearalenone        | [M-H] <sup>-</sup>                | 317.1                  | 130.8/174.9           | -85                           | -40/-32                 | -7/-9                      |

25
